# Supplementary material
Source: PubMed Central journal article supplement (PMC7344268)
Supplement: NIHMS1584965-supplement-2.pdf [file NIHMS1584965-supplement-2.pdf]

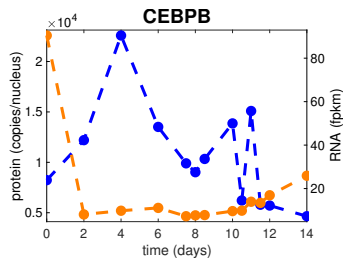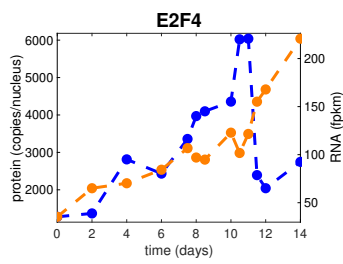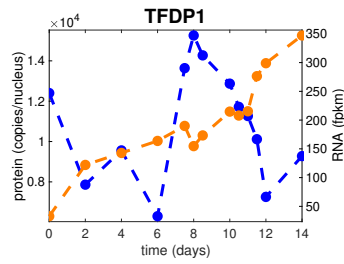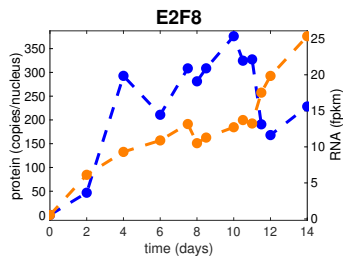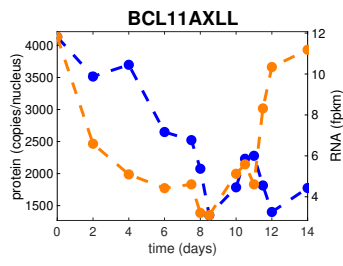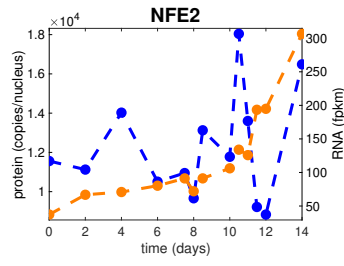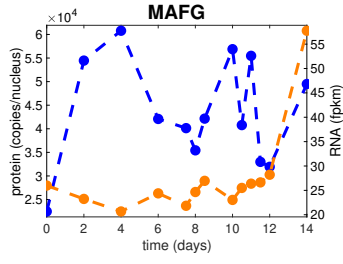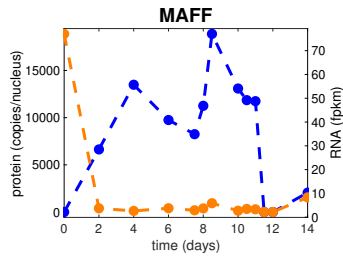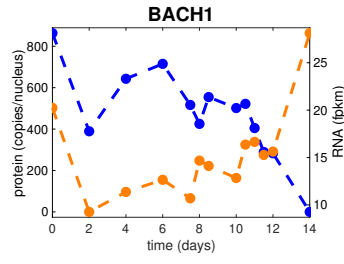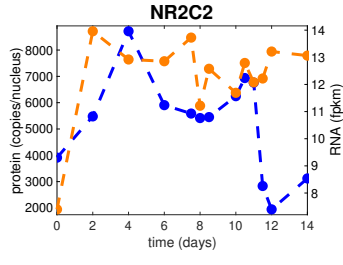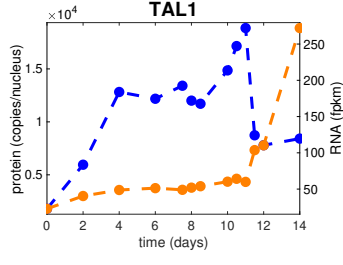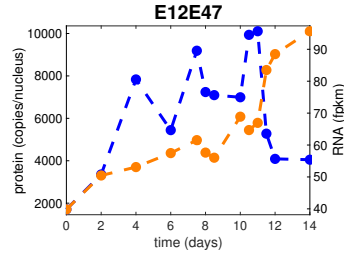

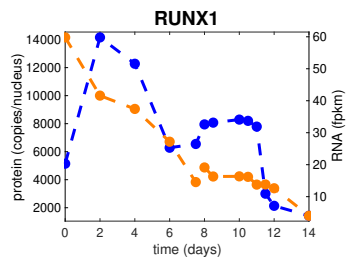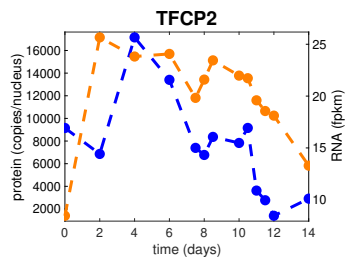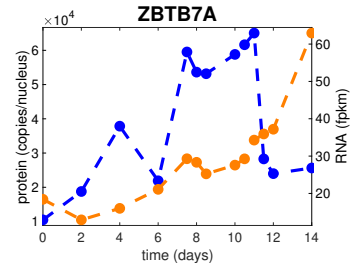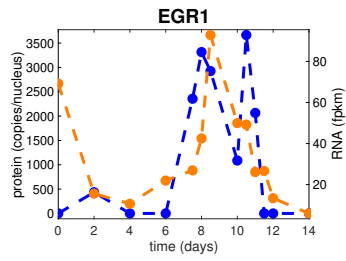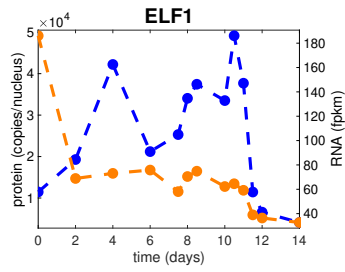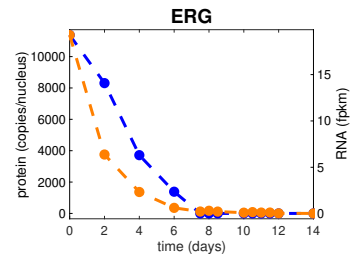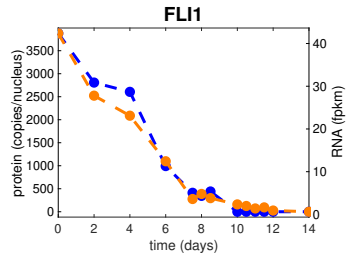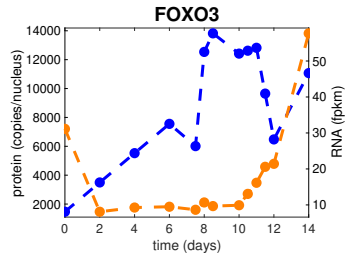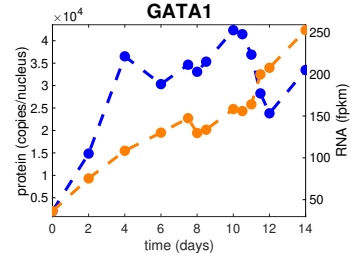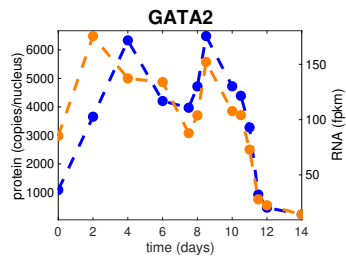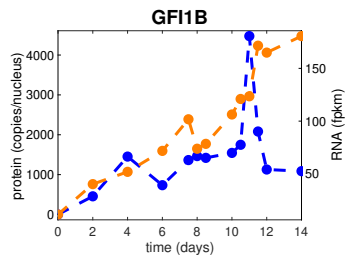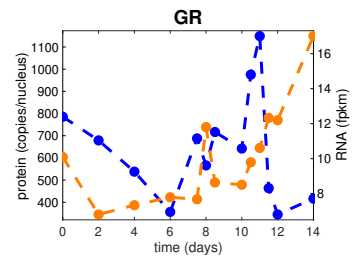

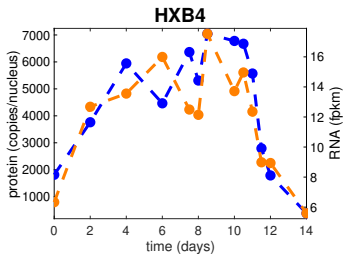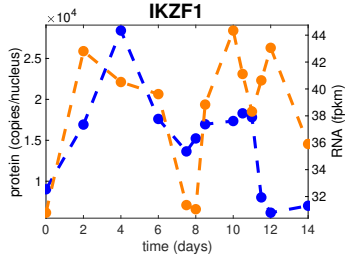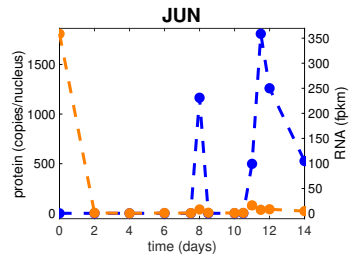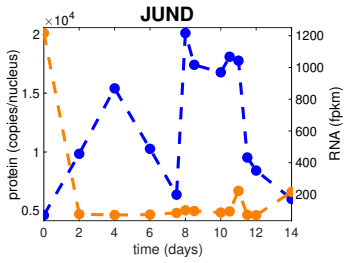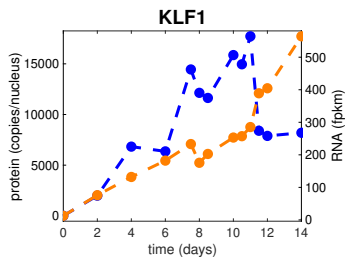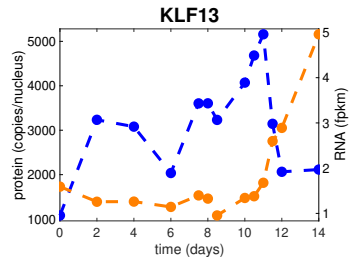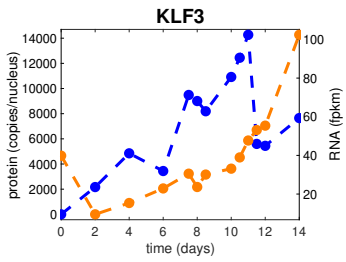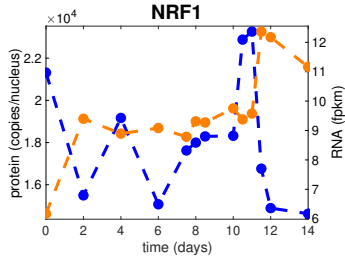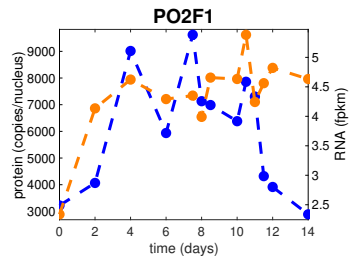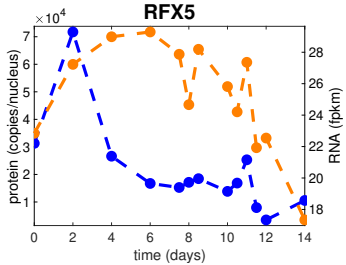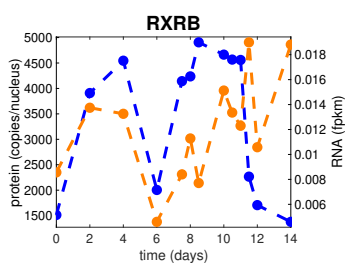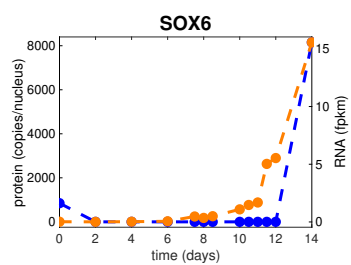

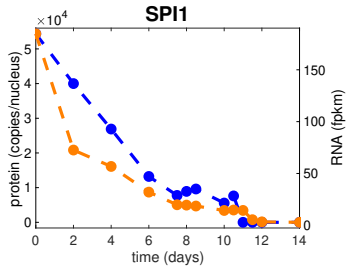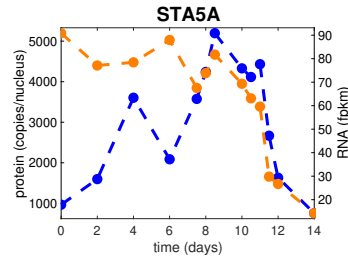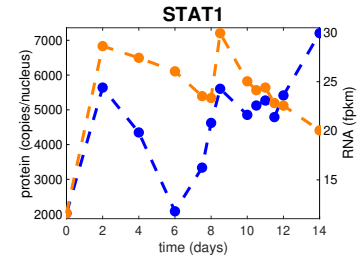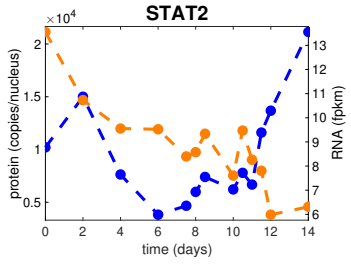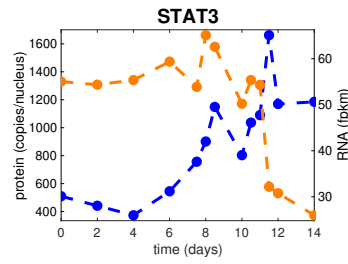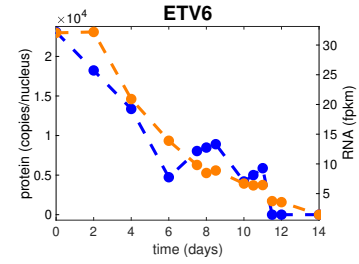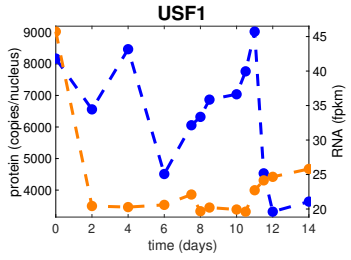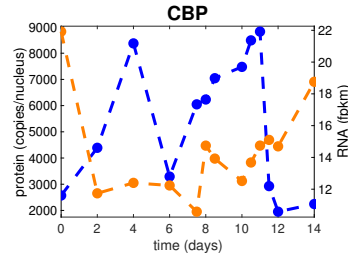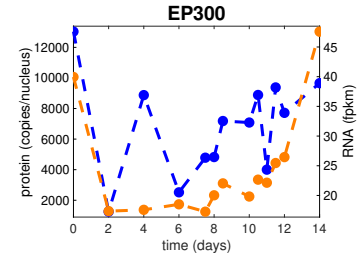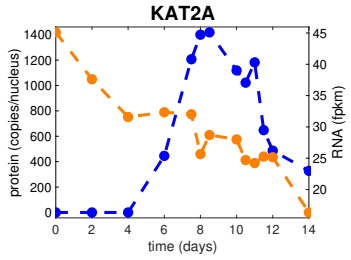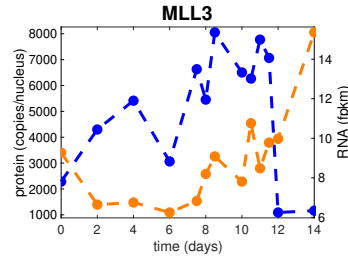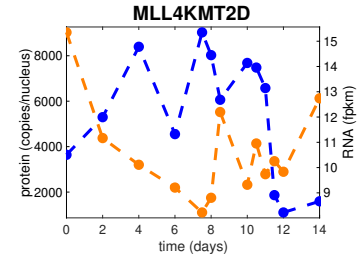

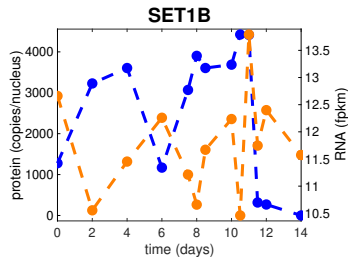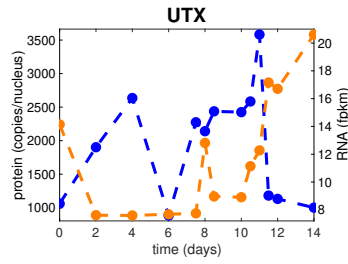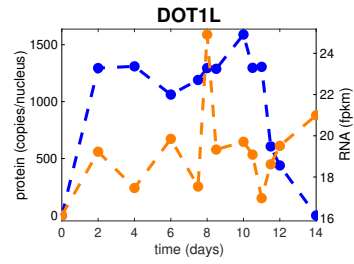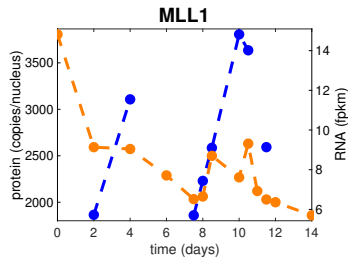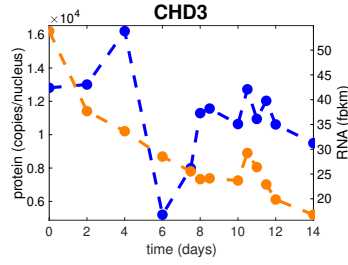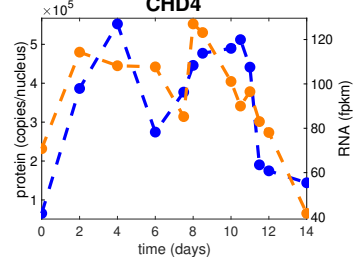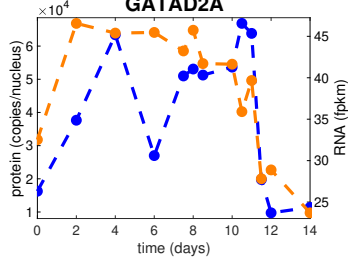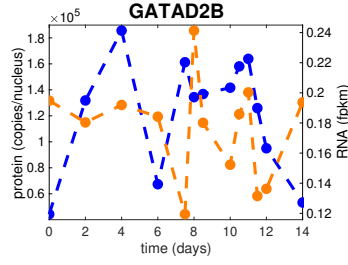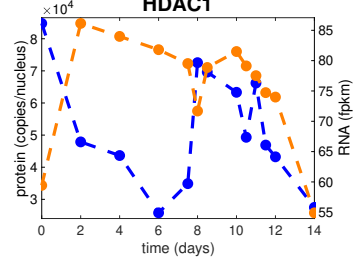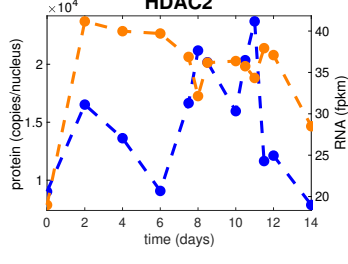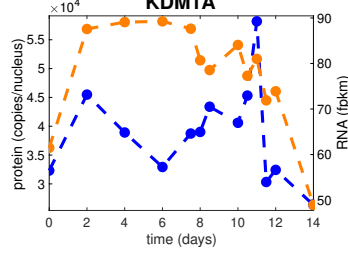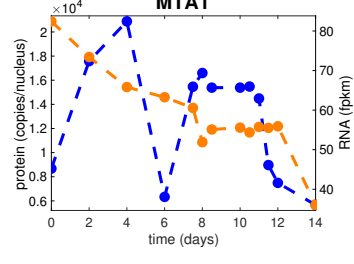

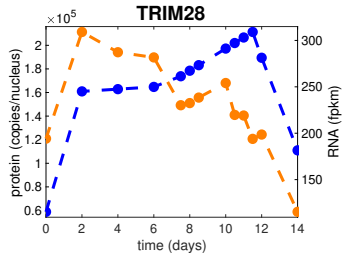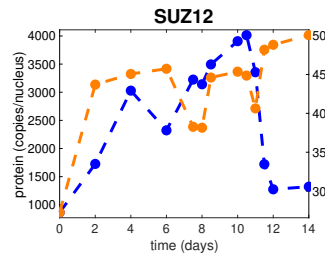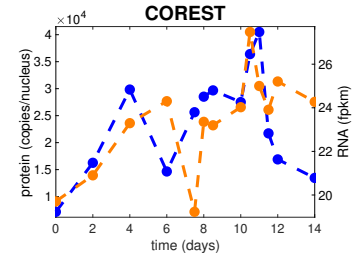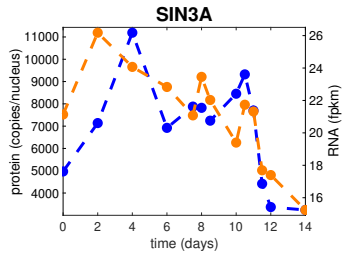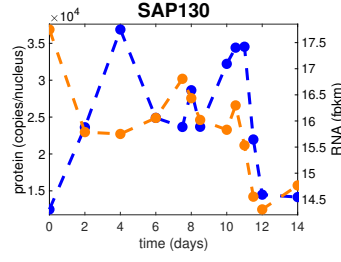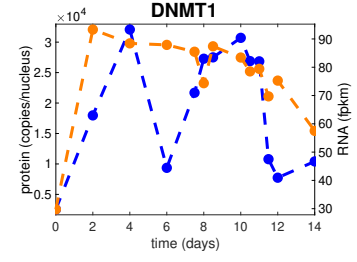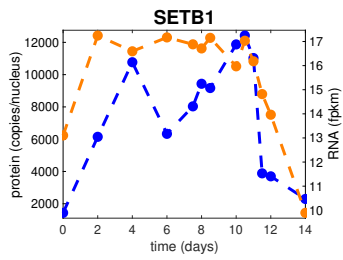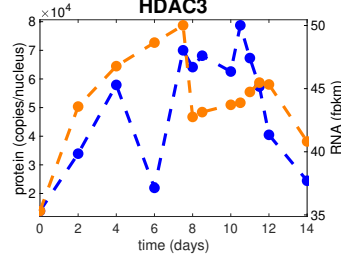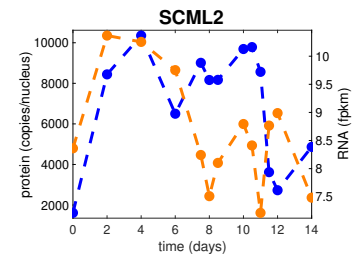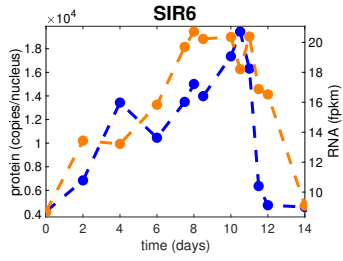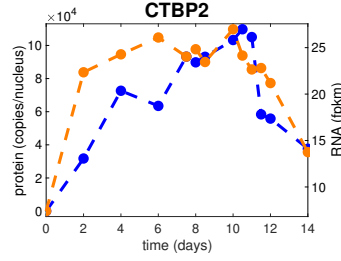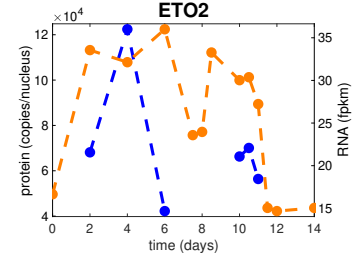

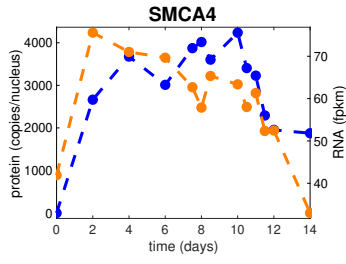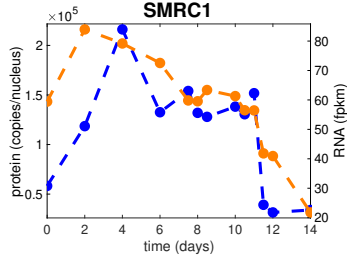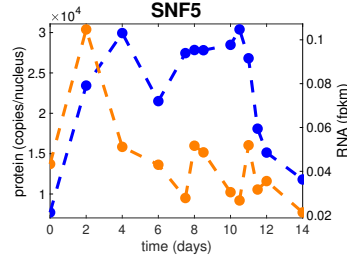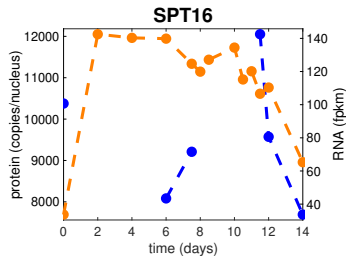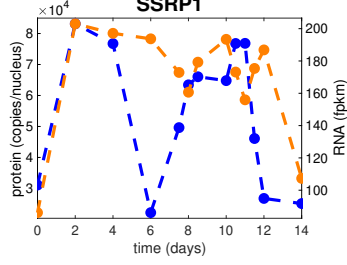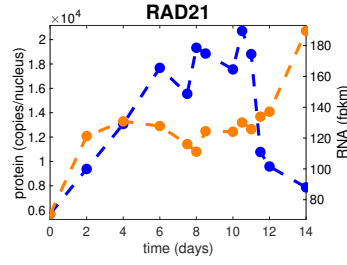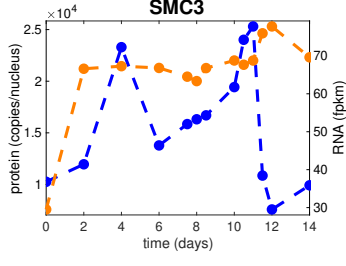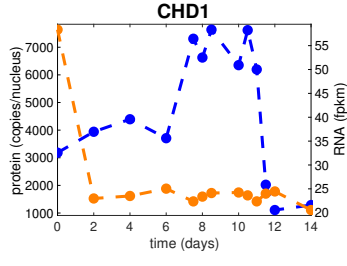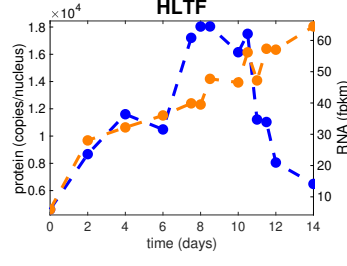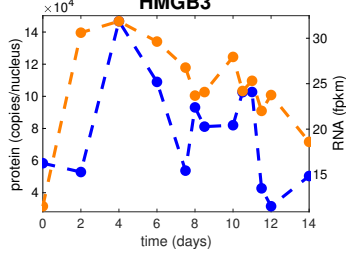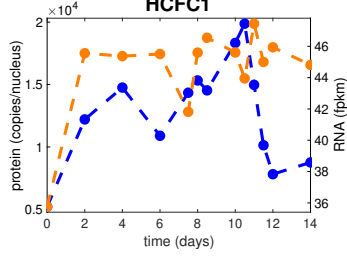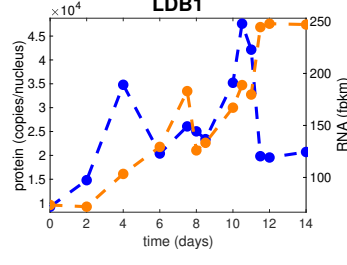

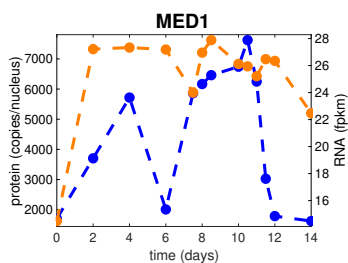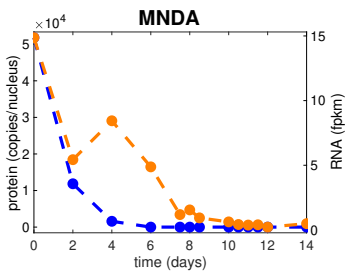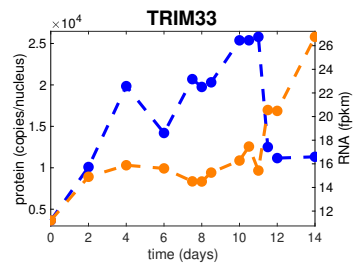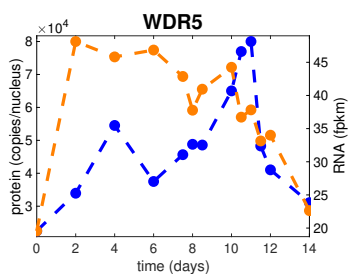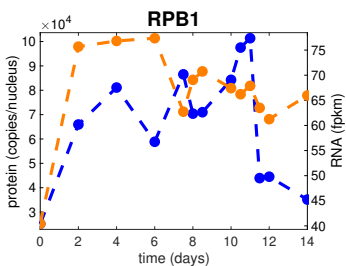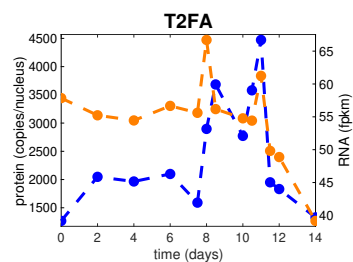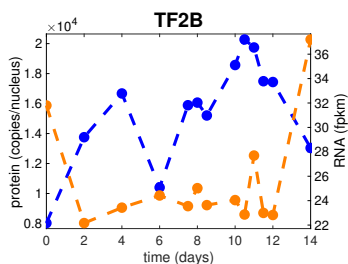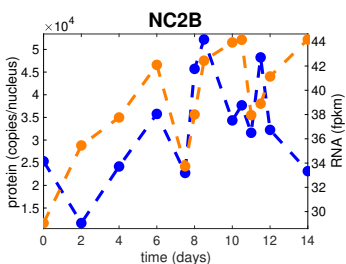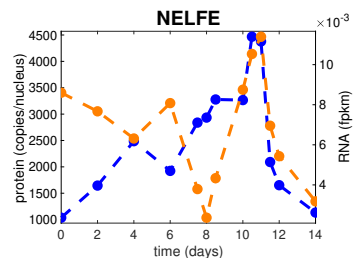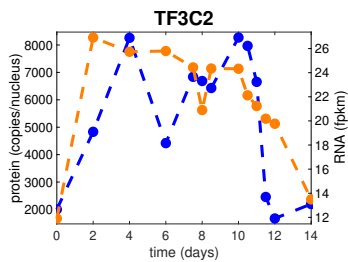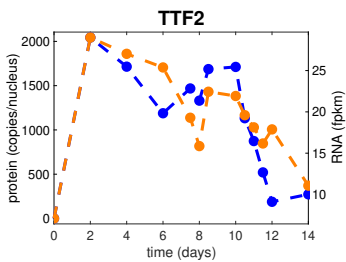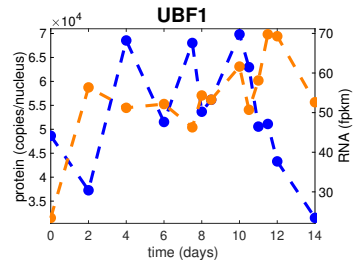



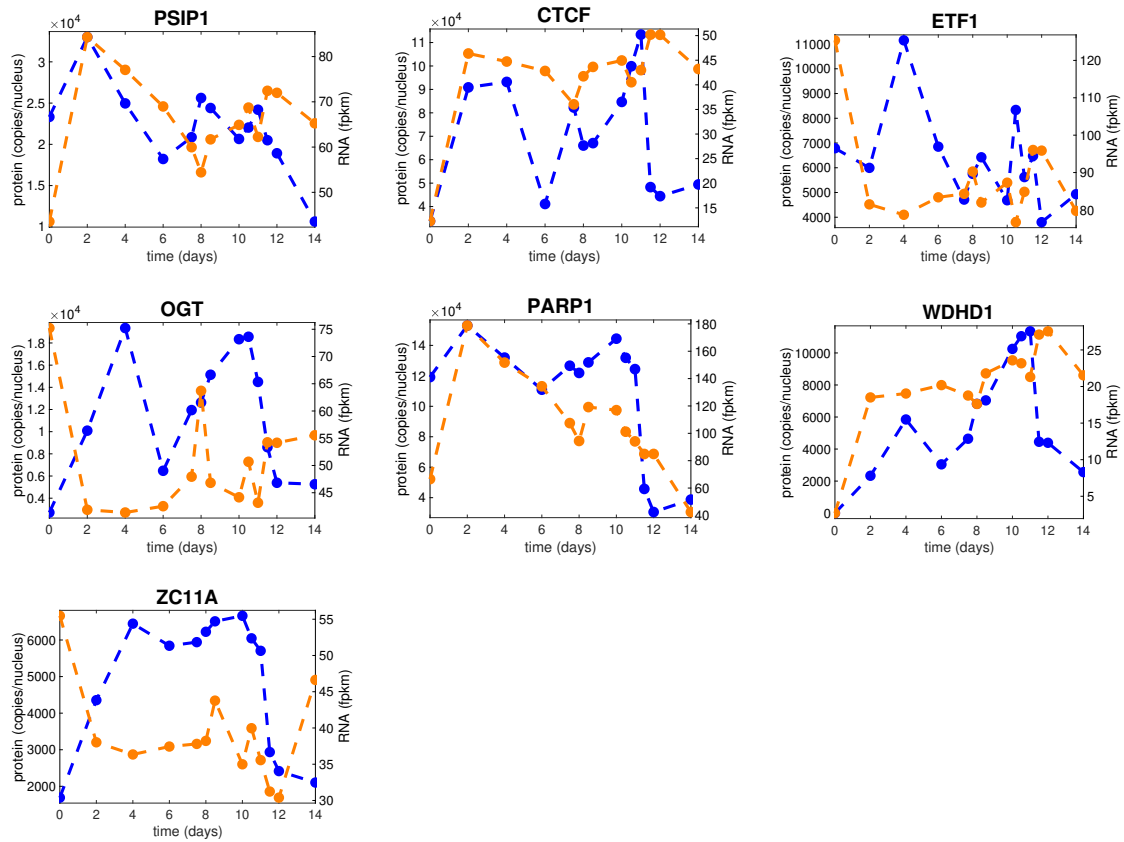

**Data S2.** (Related to Figure 2) Comparison between mRNA and Protein Abundances during Hemato/Erythropoiesis  
 Protein (blue) and mRNA (orange) abundances for the indicated genes during differentiation.
